# Supplementary material for: Magnet design for a low-emittance storage ring
Source: PubMed Central journal article supplement (PMC4181640; doi:10.1107/s160057751401666x), 2014-08-27
Supplement: s-21-00884-sup1.pdf [file s-21-00884-sup1.pdf]

Figure S1

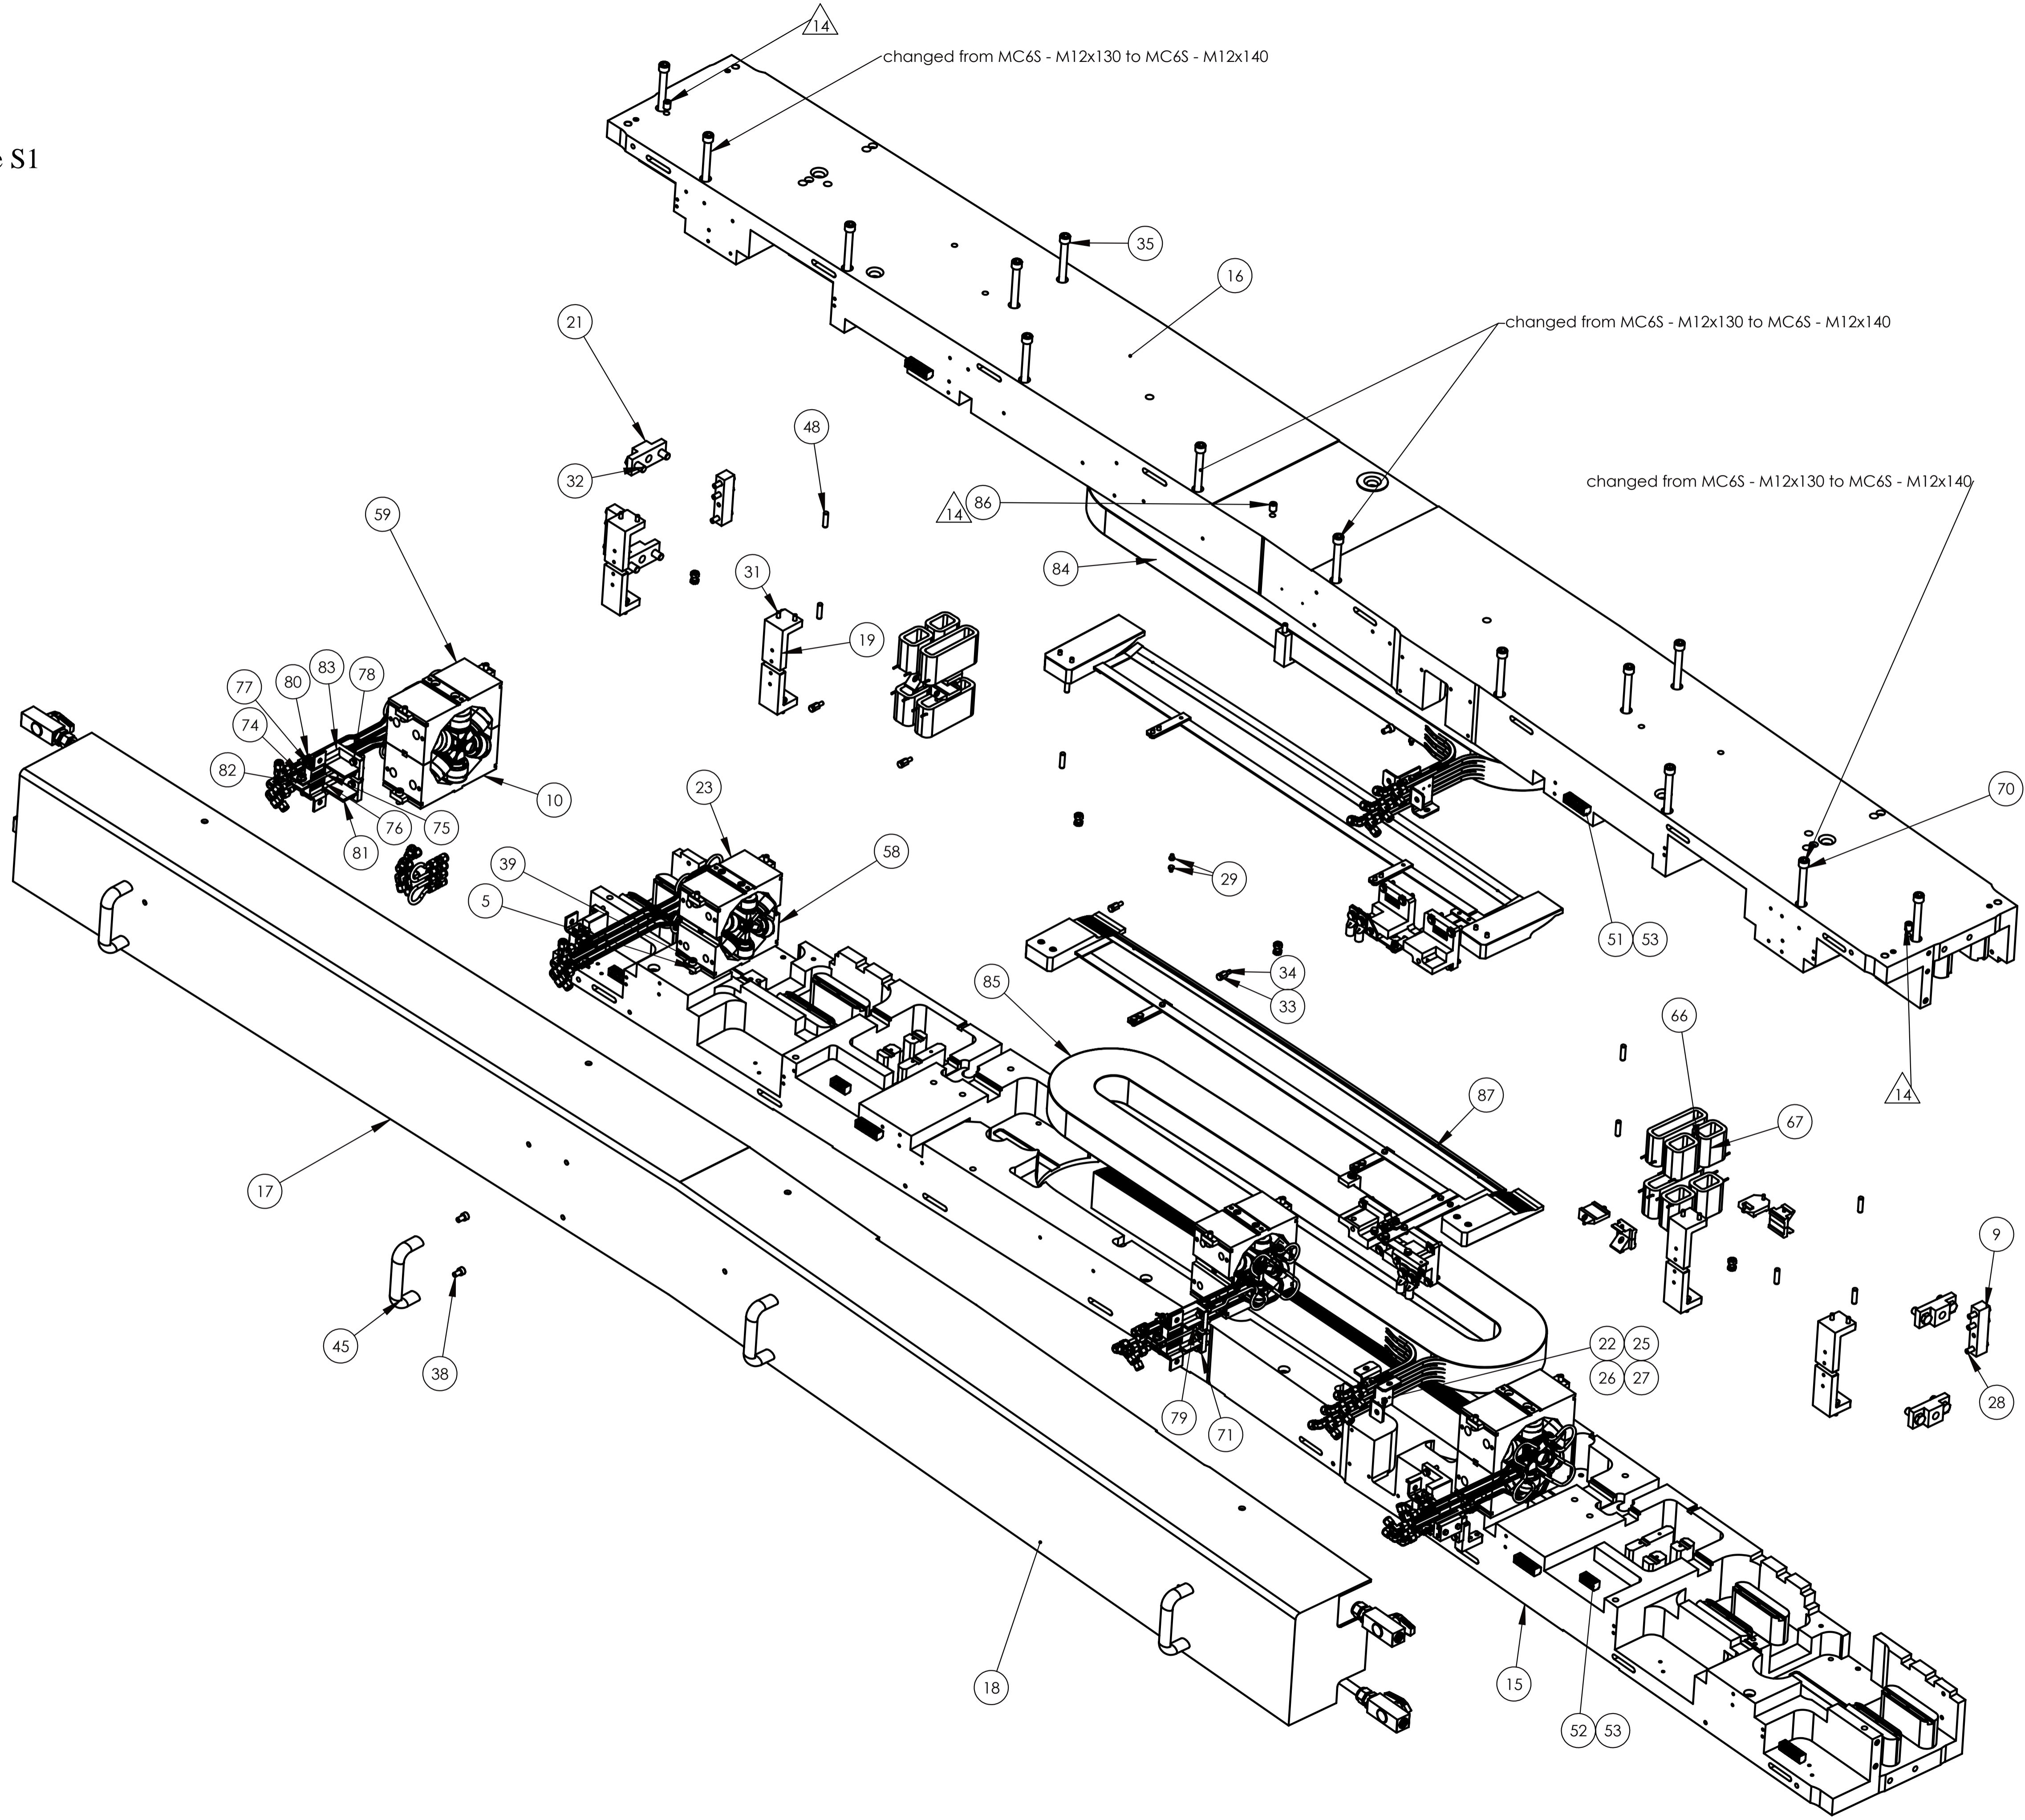

| REVISIONS |      |                                                                                                                                                                                                                                                                                                                                                                            |            |          |
|-----------|------|----------------------------------------------------------------------------------------------------------------------------------------------------------------------------------------------------------------------------------------------------------------------------------------------------------------------------------------------------------------------------|------------|----------|
| ZONE      | Rev. | Description                                                                                                                                                                                                                                                                                                                                                                | Date       | Approved |
|           | 13   | 2x sheets added: Item 54-63 added, Q-pole, item 23 replaced with MC6S - M12x140. Jumper assembly have been dissolved and are now part of this assembly. The cable lugs with bolts, nuts and washers have been removed. Each sextupole half have been given a separate drawing, see item 64 and 65 for the new drawing names. A sheet with water connections has been added | 2013-03-14 | DL, SB   |
|           | 14   | 3x stopscrews added. Dipole coils changed. Polarity changed for Q11 and Q12 on sheet 4 and in the trim coil table on sheet 5. Water connections changed on sheet 6                                                                                                                                                                                                         | 2013-04-30 | SB       |
|           | 15   | Thermostat assembly dissolved and the terminals changed from 2x 37 pos terminals to 1x 50 pos terminal on the top yoke and from 3x 37 pos terminals to 1x 37 pos and 1x 50 pos terminal on the bottom yoke.                                                                                                                                                                | 2013-09-19 | SB       |

| ITEM NO. | PART NUMBER                                      | QTY. |
|----------|--------------------------------------------------|------|
| 1        | 3.COAP- DMP017, Pole top, X-corr                 | 4    |
| 2        | 3.COAP- DMP018, Pole top, Y-corr                 | 8    |
| 3        | 3.DMA005, Shunt pcb subasm                       | 1    |
| 4        | 3.DMA009, Cover attachment subasm                | 4    |
| 5        | 3.DMP004, Clamp, poles                           | 16   |
| 6        | 3.DMP005, Coil attachment                        | 4    |
| 7        | 3.DMP006, Clamp attachment                       | 2    |
| 8        | 3.DMP064, Loop tube                              | 8    |
| 9        | 3.U3_ DMP050, Alignment tool                     | 3    |
| 10       | 3.SXF-O_ DMA101, Sextupole SF0 and SFI           | 2    |
| 11       | Water Manifold Lower U3, 201424                  | 1    |
| 12       | 3.U3_ DMA006, Coilbracket subasm                 | 4    |
| 13       | 3.U3_ DMA007, Coilbracket subasm                 | 4    |
| 14       | Water Manifold Upper U3, 201385                  | 1    |
| 15       | 3.U3_ DMP003, Yoke bottom, Uc3                   | 1    |
| 16       | 3.U3_ DMP004, Yoke top, Uc3                      | 1    |
| 17       | 3.U3_ DMP005, Cover, left                        | 1    |
| 18       | 3.U3_ DMP006, Cover, right                       | 1    |
| 19       | 3.U4_ DMP005, Attachment base                    | 12   |
| 20       | Q- Pole UC3 203528                               | 16   |
| 21       | 3.Ux_ DMP014, Attachment, lifting point          | 4    |
| 22       | Cable-Lug-KRF-1_ 5-4-Nelco                       | 18   |
| 23       | 3.SXD_ DMA101, SD Sextupole, half                | 2    |
| 24       | Elbow SS-6M0-9 Swagelok                          | 44   |
| 25       | Lock washer, DIN 6798 Typ A 4,3 A4               | 18   |
| 26       | Screw M6S M4x10 A2.sldrpt                        | 2    |
| 27       | Nut M6M-M4 A2                                    | 2    |
| 28       | Screw M6S M8x40 A2                               | 9    |
| 29       | Screw M6S-M5x6 A2                                | 4    |
| 30       | Screw M6S-M6x12 A2                               | 14   |
| 31       | Screw M6S-M6x25 A2                               | 56   |
| 32       | Screw_ M6S-M12x30H A2                            | 8    |
| 33       | Screw_ M6S-M6x8 A2                               | 4    |
| 34       | Screw-DSS-M60100x12-Bufab                        | 4    |
| 35       | Screw-MC6S-M12x130 A2                            | 10   |
| 36       | Screw-MC6S-M4x12 A2                              | 16   |
| 37       | Screw-MC6S-M6x30 A2                              | 4    |
| 38       | Screw-MC6S-M8x14 A2                              | 8    |
| 39       | Screw-MC6S-M8x20 A2                              | 16   |
| 40       | Screw-MC6S-M8x25 A2                              | 48   |
| 41       | Screw-MC6S-M8x75 A2                              | 4    |
| 42       | Thermo contact, thermik L01-60                   | 22   |
| 43       | Thermo contact, thermik L01-70                   | 22   |
| 44       | Union, SS-6M0-6_6_ Swagelok                      | 16   |
| 45       | WN135-120-M8-Wiberger                            | 4    |
| 46       | 3.U1_ DMA008, Trimcoil terminal 5-pos            | 1    |
| 47       | 3.U1_ DMA008, Trimcoil terminal 3-pos            | 1    |
| 48       | Cylindrical pin CP 8m6x30 A4                     | 10   |
| 49       | Screw M6S-M8x16 A2                               | 4    |
| 50       | Nut M6M-M8 A2                                    | 12   |
| 51       | Multi terminal strip MK3/6 Weidmüller 0274220000 | 8    |
| 52       | Multi terminal strip MK3/4 Weidmüller 0274020000 | 4    |
| 53       | MC6S M3x16 A2                                    | 26   |
| 54       | Phoenix plug in 16p1757158                       | 3    |
| 55       | Phoenix plug-in 8p1757077                        | 1    |
| 56       | Phoenix plug-in 4p1757035                        | 1    |
| 57       | Multi terminal strip MK3/8 Weidmüller 0274420000 | 1    |
| 58       | 3.SXD_ DMA104, SD Sextupole, half                | 2    |
| 59       | 3.SXF-O_ DMA104, Sextupole SF0 and SFI           | 2    |
| 60       | Coil 1 brazed UX_ DMP004, Danfysik, 7103014061   | 2    |
| 61       | Coil 4 brazed UX_ DMP004, Danfysik, 7103014064   | 2    |
| 62       | Coil 7 brazed UX_ DMP004, Danfysik, 7103017270   | 2    |
| 63       | Coil 6 brazed UX_ DMP004, Danfysik, 7103017124   | 2    |
| 64       | Coil 5 brazed UX_ DMP004, Danfysik, 7103017123   | 2    |
| 65       | Coil 8 brazed UX_ DMP004, Danfysik, 7103017265   | 2    |
| 66       | Coil COAP_ DMP002, Danfysik, 7103013516          | 4    |
| 67       | Coil COAP_ DMP014, Danfysik, 7103013517          | 8    |
| 68       | Coil 3 brazed UX_ DMP004, Danfysik, 7103014063   | 2    |
| 69       | Coil 2 brazed UX_ DMP004, Danfysik, 7103014062   | 2    |
| 70       | Screw-MC6S-M12x140 A2                            | 4    |
| 71       | 3.M1_ DMP032, Jumper bracket                     | 6    |
| 72       | 3.U3_ DMP023, Jumper spacer                      | 4    |
| 73       | Washer BRB-8_4 A2                                | 16   |
| 74       | Screw M6S-M8x25 A2                               | 8    |
| 75       | 3.M1_ DMP018, Marking [Positive]                 | 8    |
| 76       | 3.M1_ DMP018, Marking [Negative]                 | 8    |
| 77       | Screw M6S-M5x12 A2                               | 64   |
| 78       | Washer BRB-6_4 A2                                | 32   |
| 79       | 3.M1_ DMP033, Jumper bracket                     | 6    |
| 80       | Screw M6S 4x6 A2                                 | 16   |
| 81       | 3.M1_ DMP023, Jumper bracket                     | 2    |
| 82       | 3.U3_ DMP023, Jumper spacer                      | 4    |
| 83       | 3.M1_ DMP019, Jumper bracket                     | 2    |
| 84       | Coil upper UX_ DMP012, Danfysik, 7103014117      | 1    |
| 85       | Coil lower UX_ DMP012, Danfysik, 7103014116      | 1    |
| 86       | ISO 4029 A2 M12x16                               | 3    |
| 87       | 204590                                           | 1    |
| 88       | D-Sub 50p Male                                   | 1    |
| 89       | Phoenix contact 2304063                          | 1    |
| 90       | Phoenix contact 2304076                          | 2    |
| 91       | DIN mounting rail, B=35 H=7,5 L=213              | 1    |
| 92       | DIN mounting rail, B=35 H=7,5 L=261              | 1    |

|             |  |            |  |                |  |                                |  |                 |  |
|-------------|--|------------|--|----------------|--|--------------------------------|--|-----------------|--|
| Designed by |  | 2010-10-08 |  | Material       |  | Surface treatment              |  | Logos broken    |  |
| Reviewed by |  | -          |  | Approved by    |  | General tolerance (ISO 2768-1) |  | Production type |  |
| -           |  | -          |  | -              |  | fine                           |  | 3,2             |  |
| Description |  | Uc3, assy  |  | Drawing number |  | 3.U3_DMA002                    |  | Revision        |  |
| MAX-lab     |  | Uc3, assy  |  | 3.U3_DMA002    |  | 15                             |  | 1(6)            |  |

This document is our property and shall not without our permission be reproduced, stored in a retrieval system, or transmitted in any form or by any means, electronic, mechanical, photocopying, recording, or by any information storage and retrieval system.

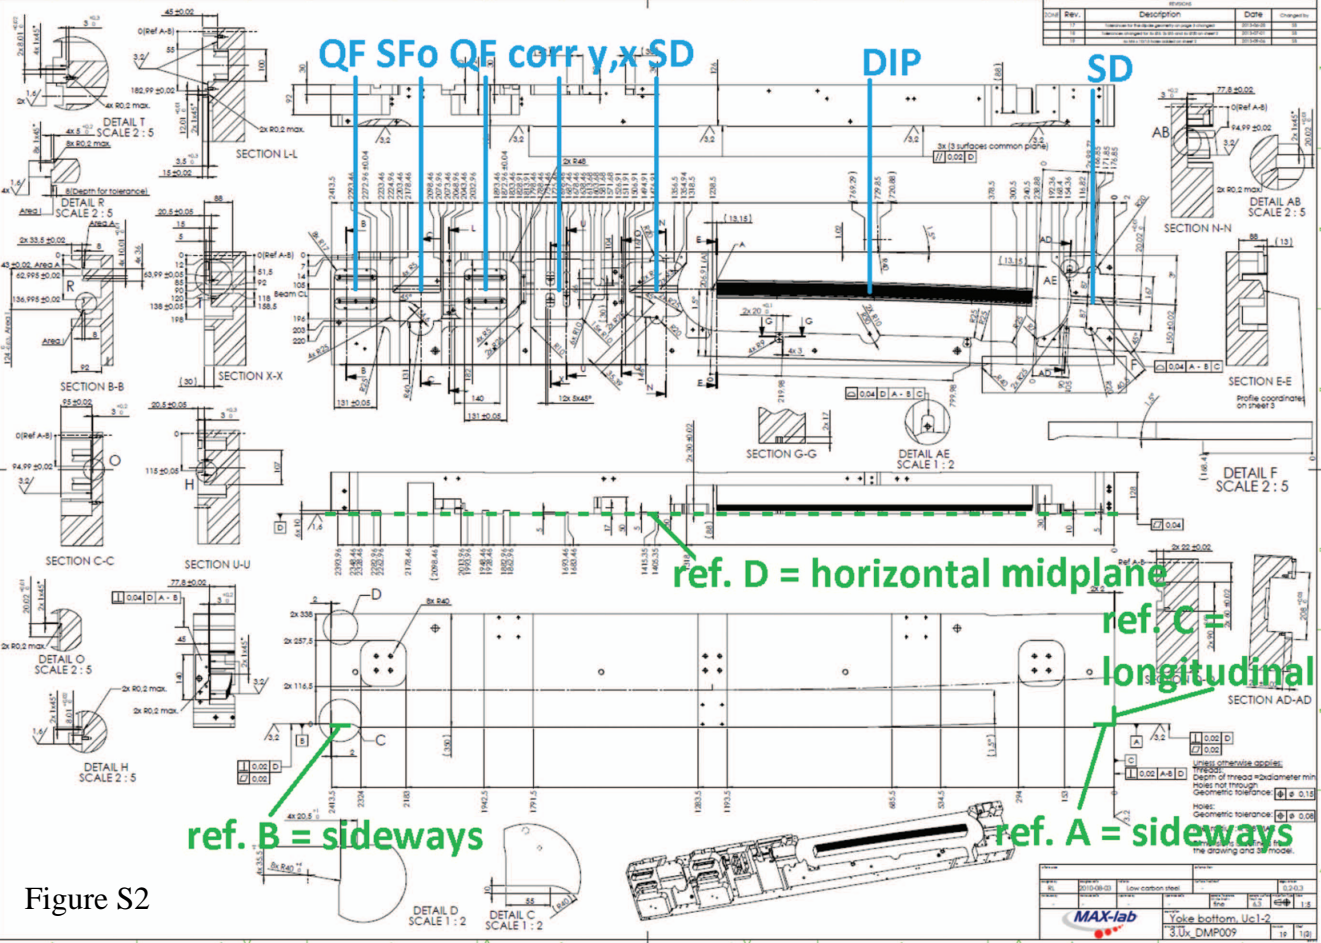

Figure S2



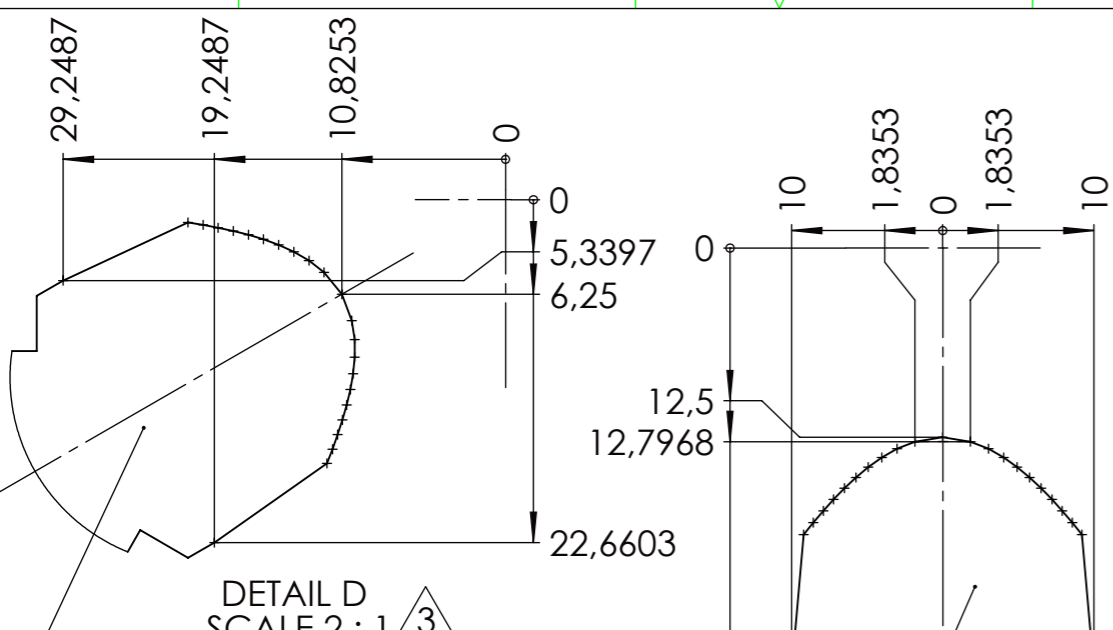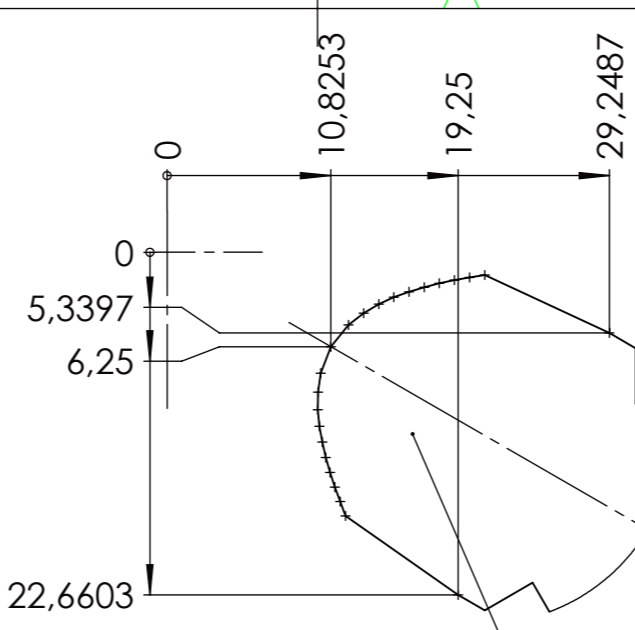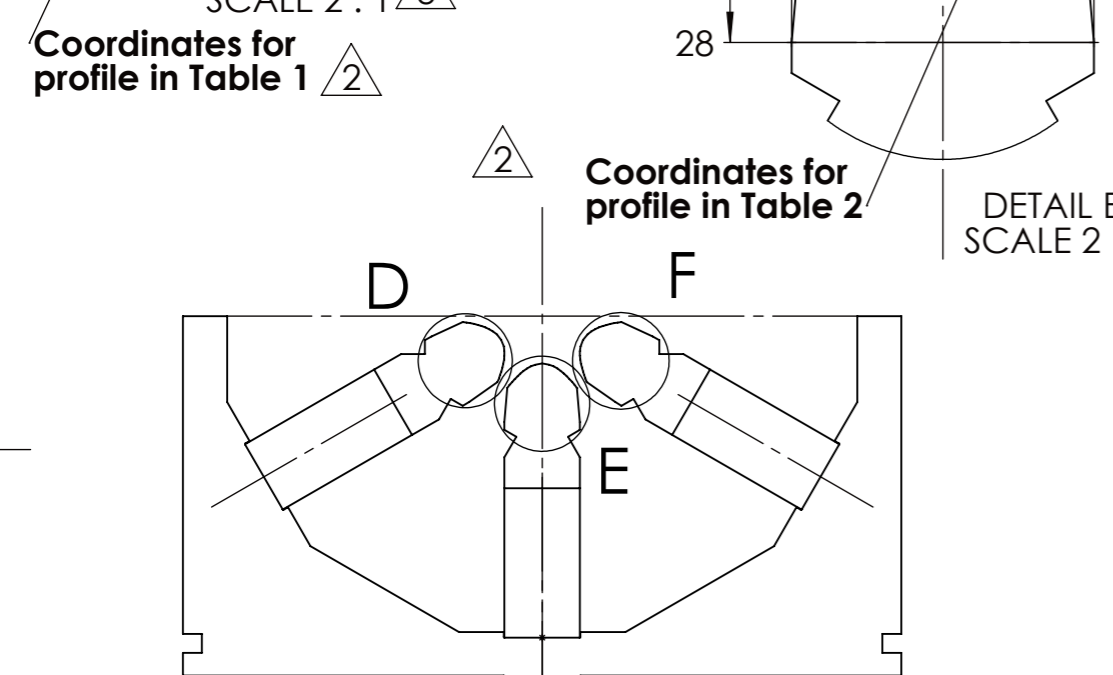

| REVISIONS |      |                                                                                      |            |          |
|-----------|------|--------------------------------------------------------------------------------------|------------|----------|
| ZONE      | REV. | DESCRIPTION                                                                          | DATE       | APPROVED |
|           | 2    | Coordinates for profile added. 6x cyl pins added.                                    | 2012-02-28 | DL       |
|           | 3    | 1x dimension removed. 2x dimension put in parentheses. Detail views changed letters. | 2012-04-20 | DL       |

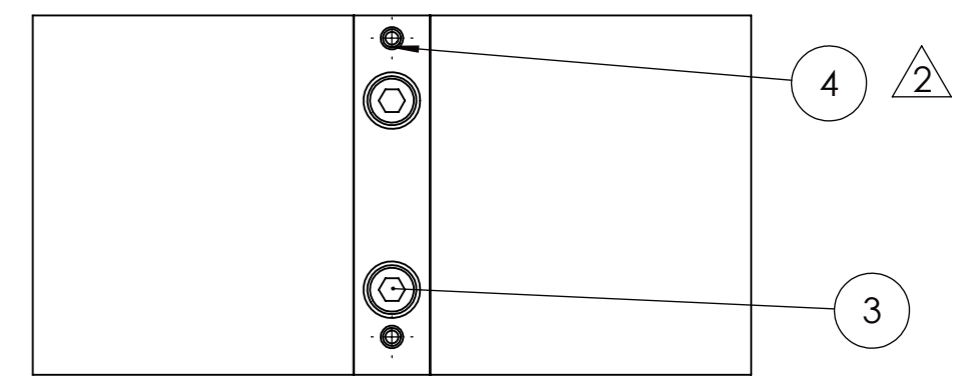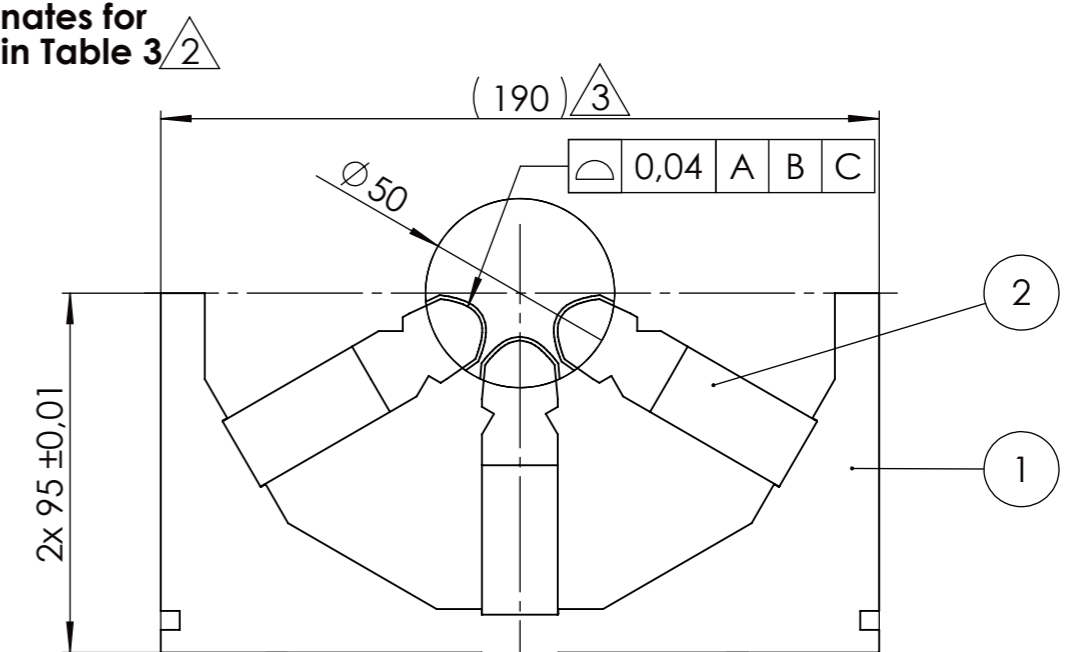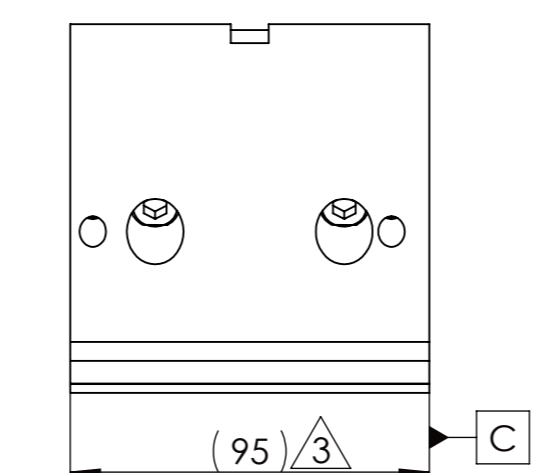

| X(mm)    | Y(mm)    |
|----------|----------|
| -29,2487 | -5,3397  |
| -21      | -1,5101  |
| -20      | -1,666   |
| -19      | -1,8468  |
| -18      | -2,0586  |
| -17      | -2,3093  |
| -16      | -2,6102  |
| -15      | -2,977   |
| -14      | -3,4339  |
| -13      | -4,0201  |
| -12      | -4,809   |
| -10,8253 | -6,25    |
| -10,1647 | -7,9878  |
| -9,9815  | -9,2483  |
| -9,9738  | -10,4074 |
| -10,0782 | -11,5019 |
| -10,2605 | -12,5513 |
| -10,4999 | -13,5678 |
| -10,7827 | -14,5591 |
| -11,0994 | -15,5311 |
| -11,4428 | -16,4875 |
| -11,8078 | -17,4315 |
| -19,2487 | -22,6603 |

| X(mm)   | Y(mm)    |
|---------|----------|
| -10     | -28      |
| -9,1923 | -18,9416 |
| -8,5572 | -18,1535 |
| -7,9006 | -17,3779 |
| -7,2172 | -16,6177 |
| -6,5001 | -15,8771 |
| -5,7395 | -15,1615 |
| -4,9218 | -14,4789 |
| -4,0262 | -13,8413 |
| -3,0185 | -13,2684 |
| -1,8353 | -12,7968 |
| 0       | -12,5    |
| 1,8353  | -12,7968 |
| 3,0185  | -13,2684 |
| 4,0262  | -13,8413 |
| 4,9218  | -14,4789 |
| 5,7395  | -15,1615 |
| 6,5001  | -15,8771 |
| 7,2172  | -16,6177 |
| 7,9006  | -17,3779 |
| 8,5572  | -18,1535 |
| 9,1923  | -18,9416 |
| 10      | -28      |

| X(mm)   | Y(mm)    |
|---------|----------|
| 29,2487 | -5,3397  |
| 21      | -1,5101  |
| 20      | -1,666   |
| 19      | -1,8468  |
| 18      | -2,0586  |
| 17      | -2,3093  |
| 16      | -2,6102  |
| 15      | -2,977   |
| 14      | -3,4339  |
| 13      | -4,0201  |
| 12      | -4,809   |
| 10,8253 | -6,25    |
| 10,1647 | -7,9878  |
| 9,9815  | -9,2483  |
| 9,9738  | -10,4074 |
| 10,0782 | -11,5019 |
| 10,2605 | -12,5513 |
| 10,4999 | -13,5678 |
| 10,7827 | -14,5591 |
| 11,0994 | -15,5311 |
| 11,4428 | -16,4875 |
| 11,8078 | -17,4315 |
| 19,2487 | -22,6603 |

| ITEM NO. | PART NUMBER                        | QTY. |
|----------|------------------------------------|------|
| 1        | 3.SXFM_DMP001, Yoke, Sextupole SFm | 1    |
| 2        | 3.SXFM_DMP002, Pole, Sextupole SFm | 3    |
| 3        | Screw-MC6S-M8x20 A2                | 6    |
| 4        | Cyl pin DIN7979 m6 6x24            | 6    |

|                                                 |                             |                  |                        |                                            |                                   |
|-------------------------------------------------|-----------------------------|------------------|------------------------|--------------------------------------------|-----------------------------------|
| Where used<br>3.SXFM_DMA001, SFm Sextupole half |                             | External BOM     |                        |                                            |                                   |
| Designed by<br>RL                               | Designed date<br>2011-06-20 | Material<br>-    | Surface treatment<br>- | Edges broken<br>0,2-0,3                    |                                   |
| Reviewed by<br>-                                | Reviewed date<br>-          | Approved by<br>- | Approved date<br>-     | General tolerance<br>SS-ISO 2768-1<br>fine | General surface finish, Ra<br>3,2 |
| Description<br>Yoke half, assembly              |                             |                  | Projection type<br>⊕   | Scale<br>1:2                               |                                   |
| Drawing number<br>3.SXFM_DMA003                 |                             |                  | Revision<br>3          | Sheet<br>1(1)                              |                                   |

Figure S3b

This document is our property and shall not without our permission in writing be altered, copied, used for manufacturing or communicated to any other person or company.
